# Supplementary material for: Genetic Diversity of Historical and Modern Populations of Russian Cattle Breeds Revealed by Microsatellite Analysis
Source: MDPI journal article supplement (doi:10.3390/genes11080940), 2020-08-14
Supplement: s1 [file s1]

Table S2. Quality of genotyping at different loci based on quality indices (QIs)<sup>1</sup>

| # | Locus   | Mean<br>QI value<br>(M ± SE) | QI = 1                  |                        | 0.75 ≤ QI < 1.00        |                        | Probability (P)<br>of correct<br>genotyping <sup>2</sup> |
|---|---------|------------------------------|-------------------------|------------------------|-------------------------|------------------------|----------------------------------------------------------|
|   |         |                              | Number of<br>samples, n | Ratio of<br>samples, % | Number of<br>samples, n | Ratio of<br>samples, % |                                                          |
| 1 | BM2113  | 0.988±0.007                  | 46                      | 93.9                   | 3                       | 6.1                    | ***                                                      |
| 2 | BM1824  | 0.976±0.010                  | 43                      | 87.8                   | 6                       | 12.2                   | ***                                                      |
| 3 | ETH10   | 0.979±0.009                  | 41                      | 83.7                   | 8                       | 16.3                   | ***                                                      |
| 4 | ETH225  | 0.991±0.006                  | 47                      | 95.9                   | 2                       | 4.1                    | ***                                                      |
| 5 | INRA023 | 0.974±0.010                  | 42                      | 85.7                   | 7                       | 14.3                   | ***                                                      |
| 6 | SPS115  | 0.968±0.011                  | 44                      | 89.8                   | 5                       | 11.2                   | ***                                                      |
| 7 | TGLA122 | 0.977±0.009                  | 43                      | 87.8                   | 6                       | 12.2                   | ***                                                      |
| 8 | TGLA126 | 0.965±0.011                  | 40                      | 81.6                   | 9                       | 18.4                   | ***                                                      |
| 9 | TGLA227 | 0.982±0.008                  | 44                      | 89.8                   | 5                       | 11.2                   | ***                                                      |

<sup>1</sup> Calculation of quality indices is describes in paragraph 2.3.

<sup>2</sup> Probability values of correct genotyping were estimated according He G. et al. [52]

\*\*\* P<0.001
