# Supplementary material for: Genetic Diversity of Historical and Modern Populations of Russian Cattle Breeds Revealed by Microsatellite Analysis
Source: MDPI journal article supplement (doi:10.3390/genes11080940), 2020-08-14
Supplement: s1 [file s1]

| #  | Sample ID | Breed | Qubit, ng/mcl | OD260/O D280 | No replicates | TGLA227 |     |      |     |    |     |      | A1  |
|----|-----------|-------|---------------|--------------|---------------|---------|-----|------|-----|----|-----|------|-----|
|    |           |       |               |              |               | A1      | A2  | +PCR | ADO | FA | Err | QI   |     |
| 1  | H1        | KH    | 26.0          | 1.97         | 5             | 81      | 89  | 5    | 0   | 0  | 0   | 1.00 | 125 |
| 2  | H2        | KH    | 47.6          | 1.84         | 5             | 81      | 89  | 5    | 0   | 0  | 0   | 1.00 | 125 |
| 3  | H3        | KH    | 10.9          | 1.95         | 5             | 81      | 81  | 5    | 0   | 0  | 0   | 1.00 | 135 |
| 4  | H5        | KH    | 18.4          | 1.97         | 5             | 83      | 83  | 5    | 0   | 0  | 0   | 1.00 | 139 |
| 5  | H6        | KH    | 2.94          | 1.96         | 5             | 81      | 93  | 5    | 0   | 0  | 0   | 1.00 | 137 |
| 6  | H7        | KH    | 8.14          | 1.81         | 5             | 81      | 81  | 5    | 0   | 0  | 0   | 1.00 | 125 |
| 7  | H8        | KH    | 1.17          | 1.74         | 5             | 89      | 91  | 5    | 0   | 0  | 0   | 1.00 | 125 |
| 8  | H9        | KH    | 9.00          | 1.92         | 5             | 89      | 91  | 5    | 0   | 0  | 0   | 1.00 | 139 |
| 9  | H12       | KH    | 1.97          | 1.66         | 5             | 81      | 83  | 5    | 0   | 0  | 0   | 1.00 | 125 |
| 10 | H14       | KH    | 11.9          | 1.92         | 5             | 93      | 97  | 5    | 0   | 0  | 0   | 1.00 | 135 |
| 11 | H16       | KH    | 25.8          | 2.00         | 5             | 81      | 89  | 5    | 0   | 0  | 0   | 1.00 | 137 |
| 12 | H17       | KH    | 6.56          | 1.95         | 5             | 83      | 89  | 5    | 0   | 0  | 0   | 1.00 | 127 |
| 13 | H18       | KH    | 14.9          | 2.00         | 5             | 81      | 89  | 5    | 0   | 0  | 0   | 1.00 | 125 |
| 14 | H19       | KH    | 13.6          | 1.87         | 5             | 81      | 101 | 5    | 0   | 1  | 1   | 0.80 | 137 |
| 15 | H20       | KH    | 6.18          | 1.88         | 5             | 81      | 89  | 5    | 0   | 0  | 0   | 1.00 | 135 |
| 16 | H21       | KH    | 10.0          | 1.92         | 5             | 89      | 91  | 5    | 0   | 0  | 0   | 1.00 | 127 |
| 17 | H22       | KH    | 20.0          | 1.88         | 5             | 81      | 83  | 5    | 0   | 0  | 0   | 1.00 | 125 |
| 18 | H24       | KH    | 3.30          | 1.82         | 5             | 81      | 83  | 5    | 0   | 0  | 0   | 1.00 | 137 |
| 19 | H25       | KH    | 63.4          | 1.96         | 5             | 87      | 91  | 5    | 0   | 0  | 0   | 1.00 | 137 |
| 20 | H27       | KH    | 9.98          | 1.73         | 5             | 89      | 97  | 5    | 0   | 0  | 0   | 1.00 | 127 |
| 21 | H29       | KH    | 6.70          | 1.85         | 5             | 89      | 93  | 5    | 0   | 0  | 0   | 1.00 | 137 |
| 22 | H30       | KH    | 3.18          | 1.70         | 5             | 81      | 89  | 5    | 0   | 0  | 0   | 1.00 | 127 |
| 23 | H33       | YR    | 6.58          | 1.82         | 5             | 77      | 91  | 5    | 0   | 0  | 0   | 1.00 | 127 |
| 24 | H35       | YR    | 8.82          | 1.83         | 8             | 101     | 103 | 8    | 0   | 0  | 0   | 1.00 | 127 |
| 25 | H36       | YR    | 13.6          | 1.88         | 8             | 83      | 91  | 8    | 0   | 0  | 0   | 1.00 | 125 |
| 26 | H37       | YR    | 11.7          | 1.88         | 5             | 83      | 93  | 5    | 0   | 0  | 0   | 1.00 | 125 |
| 27 | H39       | YR    | 8.08          | 1.85         | 8             | 83      | 87  | 8    | 0   | 0  | 0   | 1.00 | 121 |
| 28 | H40       | YR    | 1.04          | 1.85         | 8             | 81      | 93  | 8    | 0   | 0  | 0   | 1.00 | 127 |
| 29 | H41       | YR    | 9.44          | 1.92         | 5             | 81      | 81  | 5    | 0   | 0  | 0   | 1.00 | 135 |
| 30 | H42       | YR    | 8.78          | 1.74         | 5             | 83      | 93  | 5    | 0   | 1  | 1   | 0.80 | 135 |
| 31 | H43       | YR    | 1.88          | 1.82         | 5             | 89      | 91  | 5    | 0   | 0  | 0   | 1.00 | 125 |
| 32 | H44       | YR    | 8.68          | 1.98         | 8             | 81      | 93  | 8    | 0   | 0  | 0   | 1.00 | 137 |
| 33 | H46       | YR    | 1.23          | 1.69         | 5             | 83      | 87  | 5    | 0   | 0  | 0   | 1.00 | 125 |
| 34 | H47       | YR    | 1.98          | 1.93         | 5             | 91      | 91  | 5    | 0   | 0  | 0   | 1.00 | 135 |
| 35 | H50       | YR    | 1.97          | 1.74         | 5             | 79      | 81  | 5    | 0   | 0  | 0   | 1.00 | 125 |
| 36 | H51       | YR    | 35.4          | 1.93         | 5             | 89      | 93  | 4    | 0   | 0  | 0   | 1.00 | 125 |
| 37 | H52       | YR    | 7.76          | 1.85         | 5             | 81      | 99  | 5    | 0   | 0  | 0   | 1.00 | 131 |
| 38 | H55       | YR    | 6.64          | 1.86         | 5             | 83      | 87  | 5    | 0   | 0  | 0   | 1.00 | 135 |
| 39 | H56       | YR    | 17.0          | 1.97         | 5             | 87      | 91  | 5    | 1   | 0  | 1   | 0.80 | 135 |
| 40 | H62       | YR    | 5.16          | 1.77         | 5             | 91      | 101 | 5    | 0   | 0  | 0   | 1.00 | 125 |
| 41 | H63       | YR    | 1.59          | 1.73         | 5             | 81      | 87  | 5    | 0   | 0  | 0   | 1.00 | 135 |
| 42 | H67       | YR    | 2.94          | 1.85         | 5             | 81      | 97  | 5    | 0   | 0  | 0   | 1.00 | 125 |
| 43 | H71       | GR    | 9.42          | 1.88         | 5             | 79      | 97  | 5    | 0   | 0  | 0   | 1.00 | 129 |
| 44 | H72       | GR    | 4.14          | 1.93         | 5             | 89      | 91  | 5    | 0   | 0  | 0   | 1.00 | 135 |
| 45 | H99       | NV    | 5.26          | 1.86         | 8             | 97      | 97  | 8    | 0   | 1  | 1   | 0.88 | 133 |
| 46 | H101      | NV    | 9.16          | 1.82         | 5             | 89      | 93  | 5    | 0   | 0  | 0   | 1.00 | 127 |
| 47 | H111      | HL    | 7.12          | 1.76         | 8             | 87      | 87  | 7    | 1   | 0  | 1   | 0.86 | 127 |
| 48 | H112      | HL    | 6.5           | 1.83         | 8             | 89      | 89  | 8    | 0   | 0  | 0   | 1.00 | 137 |

|    |      |    |      |      |   |    |    |   |   |   |   |      |     |
|----|------|----|------|------|---|----|----|---|---|---|---|------|-----|
| 49 | H113 | HL | 4.78 | 1.66 | 8 | 89 | 93 | 8 | 0 | 0 | 0 | 1.00 | 133 |
|----|------|----|------|------|---|----|----|---|---|---|---|------|-----|

Sample ID - individual number of sample

Qubit - concentration of double-stranded DNA (ng/mcl)

OD260/OD280 - OD ratio

+PCR - number of positive PCRs

ADO - allelic drop-out

FA - false allele

Err - error

QI - quality indices

| BM2113 |      |     |    |     |      | ETH10 |     |      |     |    |     |      | SPS11 |     |      |     |
|--------|------|-----|----|-----|------|-------|-----|------|-----|----|-----|------|-------|-----|------|-----|
| A2     | +PCR | ADO | FA | Err | QI   | A1    | A2  | +PCR | ADO | FA | Err | QI   | A1    | A2  | +PCR | ADO |
| 137    | 5    | 0   | 0  | 0   | 1.00 | 219   | 221 | 5    | 0   | 0  | 0   | 1.00 | 248   | 252 | 5    | 0   |
| 139    | 5    | 0   | 0  | 0   | 1.00 | 217   | 219 | 5    | 0   | 0  | 0   | 1.00 | 248   | 248 | 5    | 0   |
| 139    | 5    | 0   | 0  | 0   | 1.00 | 213   | 219 | 5    | 0   | 0  | 0   | 1.00 | 252   | 256 | 5    | 0   |
| 139    | 5    | 0   | 0  | 0   | 1.00 | 217   | 219 | 5    | 0   | 0  | 0   | 1.00 | 248   | 252 | 5    | 0   |
| 139    | 5    | 0   | 0  | 0   | 1.00 | 219   | 219 | 5    | 0   | 0  | 0   | 1.00 | 248   | 248 | 5    | 0   |
| 137    | 5    | 0   | 0  | 0   | 1.00 | 219   | 219 | 5    | 0   | 0  | 0   | 1.00 | 248   | 252 | 5    | 0   |
| 137    | 5    | 0   | 0  | 0   | 1.00 | 213   | 219 | 5    | 0   | 0  | 0   | 1.00 | 248   | 254 | 5    | 0   |
| 141    | 5    | 0   | 0  | 0   | 1.00 | 219   | 221 | 5    | 0   | 0  | 0   | 1.00 | 248   | 256 | 5    | 0   |
| 125    | 5    | 0   | 0  | 0   | 1.00 | 217   | 221 | 5    | 0   | 0  | 0   | 1.00 | 248   | 252 | 5    | 0   |
| 137    | 5    | 0   | 0  | 0   | 1.00 | 217   | 219 | 5    | 0   | 0  | 0   | 1.00 | 248   | 256 | 5    | 0   |
| 137    | 5    | 0   | 0  | 0   | 1.00 | 213   | 219 | 5    | 1   | 0  | 1   | 0.80 | 248   | 252 | 5    | 0   |
| 139    | 5    | 0   | 0  | 0   | 1.00 | 219   | 221 | 5    | 0   | 0  | 0   | 1.00 | 248   | 248 | 5    | 0   |
| 125    | 5    | 0   | 0  | 0   | 1.00 | 217   | 219 | 5    | 0   | 0  | 0   | 1.00 | 248   | 252 | 5    | 0   |
| 139    | 5    | 0   | 0  | 0   | 1.00 | 219   | 219 | 5    | 0   | 0  | 0   | 1.00 | 248   | 254 | 5    | 0   |
| 137    | 5    | 0   | 0  | 0   | 1.00 | 213   | 213 | 5    | 0   | 0  | 0   | 1.00 | 248   | 256 | 5    | 0   |
| 137    | 5    | 0   | 0  | 0   | 1.00 | 219   | 219 | 5    | 0   | 0  | 0   | 1.00 | 248   | 248 | 5    | 0   |
| 133    | 5    | 0   | 0  | 0   | 1.00 | 223   | 225 | 5    | 0   | 0  | 0   | 1.00 | 248   | 248 | 5    | 0   |
| 139    | 5    | 0   | 0  | 0   | 1.00 | 213   | 219 | 5    | 0   | 0  | 0   | 1.00 | 248   | 256 | 5    | 0   |
| 139    | 5    | 0   | 0  | 0   | 1.00 | 217   | 219 | 5    | 0   | 0  | 0   | 1.00 | 248   | 248 | 5    | 0   |
| 139    | 5    | 0   | 0  | 0   | 1.00 | 219   | 221 | 5    | 0   | 0  | 0   | 1.00 | 252   | 256 | 5    | 0   |
| 139    | 5    | 0   | 0  | 0   | 1.00 | 213   | 219 | 5    | 0   | 0  | 0   | 1.00 | 248   | 248 | 5    | 0   |
| 133    | 5    | 0   | 0  | 0   | 1.00 | 219   | 219 | 5    | 0   | 0  | 0   | 1.00 | 252   | 254 | 5    | 0   |
| 135    | 5    | 0   | 0  | 0   | 1.00 | 217   | 219 | 5    | 0   | 0  | 0   | 1.00 | 254   | 260 | 5    | 0   |
| 135    | 8    | 0   | 0  | 0   | 1.00 | 219   | 223 | 8    | 0   | 0  | 0   | 1.00 | 248   | 248 | 8    | 2   |
| 139    | 8    | 0   | 0  | 0   | 1.00 | 219   | 221 | 8    | 1   | 1  | 2   | 0.75 | 248   | 260 | 8    | 1   |
| 139    | 5    | 0   | 0  | 0   | 1.00 | 221   | 223 | 5    | 0   | 0  | 0   | 1.00 | 248   | 250 | 5    | 0   |
| 141    | 8    | 0   | 1  | 1   | 0.88 | 217   | 219 | 6    | 0   | 0  | 0   | 1.00 | 248   | 256 | 7    | 1   |
| 139    | 8    | 0   | 0  | 0   | 1.00 | 213   | 219 | 8    | 2   | 0  | 2   | 0.75 | 248   | 248 | 5    | 0   |
| 137    | 5    | 1   | 0  | 1   | 0.80 | 219   | 219 | 5    | 0   | 0  | 0   | 1.00 | 248   | 248 | 5    | 0   |
| 139    | 5    | 0   | 0  | 0   | 1.00 | 221   | 221 | 4    | 0   | 0  | 0   | 1.00 | 248   | 252 | 5    | 0   |
| 135    | 5    | 0   | 0  | 0   | 1.00 | 221   | 223 | 5    | 0   | 0  | 0   | 1.00 | 248   | 256 | 5    | 1   |
| 139    | 8    | 0   | 0  | 0   | 1.00 | 215   | 221 | 6    | 1   | 0  | 1   | 0.83 | 248   | 248 | 7    | 0   |
| 135    | 5    | 0   | 0  | 0   | 1.00 | 219   | 219 | 5    | 0   | 0  | 0   | 1.00 | 248   | 256 | 4    | 0   |
| 137    | 5    | 0   | 0  | 0   | 1.00 | 217   | 217 | 5    | 0   | 0  | 0   | 1.00 | 248   | 260 | 5    | 0   |
| 125    | 5    | 0   | 0  | 0   | 1.00 | 217   | 217 | 5    | 0   | 0  | 0   | 1.00 | 252   | 260 | 5    | 0   |
| 135    | 5    | 0   | 0  | 0   | 1.00 | 217   | 219 | 5    | 0   | 0  | 0   | 1.00 | 248   | 260 | 5    | 0   |
| 139    | 5    | 0   | 0  | 0   | 1.00 | 217   | 221 | 5    | 0   | 0  | 0   | 1.00 | 248   | 252 | 5    | 0   |
| 137    | 5    | 0   | 0  | 0   | 1.00 | 217   | 223 | 5    | 0   | 0  | 0   | 1.00 | 252   | 254 | 5    | 0   |
| 141    | 5    | 0   | 0  | 0   | 1.00 | 219   | 219 | 5    | 0   | 0  | 0   | 1.00 | 248   | 248 | 5    | 0   |
| 125    | 5    | 0   | 0  | 0   | 1.00 | 217   | 219 | 5    | 0   | 0  | 0   | 1.00 | 248   | 256 | 5    | 0   |
| 137    | 5    | 0   | 0  | 0   | 1.00 | 217   | 219 | 5    | 0   | 0  | 0   | 1.00 | 248   | 252 | 5    | 0   |
| 125    | 5    | 0   | 0  | 0   | 1.00 | 219   | 221 | 5    | 0   | 0  | 0   | 1.00 | 248   | 248 | 5    | 0   |
| 139    | 5    | 0   | 0  | 0   | 1.00 | 217   | 225 | 5    | 0   | 0  | 0   | 1.00 | 248   | 254 | 5    | 0   |
| 135    | 5    | 0   | 0  | 0   | 1.00 | 219   | 219 | 5    | 0   | 0  | 0   | 1.00 | 248   | 254 | 5    | 0   |
| 139    | 8    | 0   | 0  | 0   | 1.00 | 219   | 219 | 8    | 0   | 0  | 0   | 1.00 | 248   | 252 | 8    | 2   |
| 129    | 5    | 0   | 0  | 0   | 1.00 | 211   | 219 | 5    | 0   | 0  | 0   | 1.00 | 250   | 254 | 5    | 0   |
| 139    | 8    | 2   | 0  | 2   | 0.75 | 217   | 219 | 7    | 1   | 0  | 1   | 0.86 | 248   | 248 | 5    | 0   |
| 139    | 8    | 0   | 0  | 0   | 1.00 | 219   | 219 | 6    | 0   | 0  | 0   | 1.00 | 248   | 248 | 5    | 0   |

|     |   |   |   |   |      |     |     |   |   |   |   |      |     |     |   |   |
|-----|---|---|---|---|------|-----|-----|---|---|---|---|------|-----|-----|---|---|
| 135 | 8 | 0 | 0 | 0 | 1.00 | 215 | 217 | 8 | 0 | 0 | 0 | 1.00 | 248 | 248 | 5 | 0 |
|-----|---|---|---|---|------|-----|-----|---|---|---|---|------|-----|-----|---|---|

| 5  |     |      | TGLA122 |     |      |     |    |     |      | INRA23 |     |      |     |    |     |      |
|----|-----|------|---------|-----|------|-----|----|-----|------|--------|-----|------|-----|----|-----|------|
| FA | Err | QI   | A1      | A2  | +PCR | ADO | FA | Err | QI   | A1     | A2  | +PCR | ADO | FA | Err | QI   |
| 0  | 0   | 1.00 | 143     | 153 | 5    | 0   | 0  | 0   | 1.00 | 206    | 210 | 5    | 0   | 0  | 0   | 1.00 |
| 0  | 0   | 1.00 | 143     | 143 | 5    | 0   | 0  | 0   | 1.00 | 206    | 214 | 5    | 0   | 0  | 0   | 1.00 |
| 0  | 0   | 1.00 | 143     | 143 | 5    | 0   | 0  | 0   | 1.00 | 198    | 206 | 5    | 0   | 0  | 0   | 1.00 |
| 0  | 0   | 1.00 | 143     | 153 | 5    | 0   | 0  | 0   | 1.00 | 210    | 214 | 5    | 0   | 0  | 0   | 1.00 |
| 0  | 0   | 1.00 | 151     | 171 | 5    | 0   | 0  | 0   | 1.00 | 206    | 208 | 5    | 0   | 0  | 0   | 1.00 |
| 0  | 0   | 1.00 | 143     | 147 | 5    | 0   | 0  | 0   | 1.00 | 206    | 216 | 5    | 0   | 0  | 0   | 1.00 |
| 0  | 0   | 1.00 | 143     | 169 | 5    | 0   | 0  | 0   | 1.00 | 208    | 214 | 5    | 0   | 0  | 0   | 1.00 |
| 0  | 0   | 1.00 | 143     | 151 | 5    | 0   | 0  | 0   | 1.00 | 208    | 212 | 5    | 0   | 0  | 0   | 1.00 |
| 0  | 0   | 1.00 | 143     | 179 | 5    | 0   | 0  | 0   | 1.00 | 208    | 212 | 5    | 0   | 0  | 0   | 1.00 |
| 0  | 0   | 1.00 | 141     | 143 | 5    | 0   | 0  | 0   | 1.00 | 214    | 214 | 5    | 0   | 0  | 0   | 1.00 |
| 0  | 0   | 1.00 | 143     | 161 | 5    | 0   | 1  | 1   | 0.80 | 206    | 210 | 5    | 0   | 0  | 0   | 1.00 |
| 0  | 0   | 1.00 | 141     | 151 | 5    | 0   | 0  | 0   | 1.00 | 210    | 212 | 5    | 0   | 0  | 0   | 1.00 |
| 0  | 0   | 1.00 | 143     | 143 | 5    | 0   | 0  | 0   | 1.00 | 208    | 212 | 5    | 0   | 0  | 0   | 1.00 |
| 0  | 0   | 1.00 | 143     | 151 | 5    | 0   | 0  | 0   | 1.00 | 198    | 212 | 5    | 0   | 0  | 0   | 1.00 |
| 0  | 0   | 1.00 | 143     | 143 | 5    | 0   | 0  | 0   | 1.00 | 208    | 216 | 5    | 0   | 0  | 0   | 1.00 |
| 0  | 0   | 1.00 | 143     | 163 | 5    | 0   | 0  | 0   | 1.00 | 206    | 214 | 5    | 0   | 0  | 0   | 1.00 |
| 0  | 0   | 1.00 | 151     | 177 | 5    | 0   | 0  | 0   | 1.00 | 206    | 214 | 5    | 0   | 0  | 0   | 1.00 |
| 0  | 0   | 1.00 | 141     | 143 | 5    | 0   | 0  | 0   | 1.00 | 214    | 216 | 5    | 0   | 0  | 0   | 1.00 |
| 0  | 0   | 1.00 | 143     | 143 | 5    | 0   | 0  | 0   | 1.00 | 208    | 210 | 5    | 0   | 0  | 0   | 1.00 |
| 0  | 0   | 1.00 | 143     | 149 | 5    | 0   | 0  | 0   | 1.00 | 212    | 214 | 5    | 0   | 0  | 0   | 1.00 |
| 0  | 0   | 1.00 | 143     | 153 | 5    | 0   | 0  | 0   | 1.00 | 214    | 214 | 5    | 0   | 0  | 0   | 1.00 |
| 0  | 0   | 1.00 | 143     | 151 | 5    | 0   | 0  | 0   | 1.00 | 198    | 210 | 5    | 0   | 0  | 0   | 1.00 |
| 0  | 0   | 1.00 | 143     | 143 | 5    | 0   | 0  | 0   | 1.00 | 206    | 214 | 5    | 0   | 0  | 0   | 1.00 |
| 0  | 2   | 0.75 | 143     | 153 | 8    | 0   | 0  | 0   | 1.00 | 208    | 212 | 8    | 1   | 1  | 2   | 0.75 |
| 0  | 1   | 0.88 | 141     | 153 | 8    | 0   | 0  | 0   | 1.00 | 206    | 214 | 8    | 1   | 0  | 1   | 0.88 |
| 0  | 0   | 1.00 | 143     | 151 | 5    | 0   | 0  | 0   | 1.00 | 206    | 214 | 5    | 0   | 0  | 0   | 1.00 |
| 0  | 1   | 0.86 | 143     | 143 | 8    | 0   | 0  | 0   | 1.00 | 204    | 208 | 7    | 1   | 0  | 1   | 0.86 |
| 1  | 1   | 0.80 | 143     | 167 | 8    | 0   | 0  | 0   | 1.00 | 208    | 214 | 5    | 0   | 0  | 0   | 1.00 |
| 0  | 0   | 1.00 | 143     | 143 | 5    | 0   | 0  | 0   | 1.00 | 202    | 214 | 5    | 0   | 0  | 0   | 1.00 |
| 0  | 0   | 1.00 | 151     | 153 | 5    | 0   | 0  | 0   | 1.00 | 214    | 214 | 5    | 0   | 0  | 0   | 1.00 |
| 0  | 1   | 0.80 | 143     | 143 | 5    | 0   | 1  | 1   | 0.80 | 206    | 214 | 5    | 0   | 0  | 0   | 1.00 |
| 0  | 0   | 1.00 | 143     | 149 | 8    | 1   | 0  | 1   | 0.88 | 204    | 214 | 5    | 0   | 0  | 0   | 1.00 |
| 0  | 0   | 1.00 | 143     | 151 | 5    | 0   | 0  | 0   | 1.00 | 208    | 214 | 4    | 1   | 0  | 1   | 0.75 |
| 0  | 0   | 1.00 | 151     | 151 | 5    | 0   | 0  | 0   | 1.00 | 210    | 214 | 5    | 0   | 0  | 0   | 1.00 |
| 0  | 0   | 1.00 | 151     | 157 | 5    | 0   | 0  | 0   | 1.00 | 208    | 208 | 5    | 0   | 0  | 0   | 1.00 |
| 0  | 0   | 1.00 | 141     | 147 | 5    | 0   | 0  | 0   | 1.00 | 198    | 206 | 5    | 0   | 0  | 0   | 1.00 |
| 0  | 0   | 1.00 | 151     | 169 | 5    | 0   | 0  | 0   | 1.00 | 212    | 214 | 5    | 0   | 0  | 0   | 1.00 |
| 0  | 0   | 1.00 | 151     | 153 | 5    | 0   | 0  | 0   | 1.00 | 206    | 214 | 5    | 0   | 0  | 0   | 1.00 |
| 0  | 0   | 1.00 | 141     | 181 | 5    | 1   | 0  | 1   | 0.80 | 206    | 214 | 5    | 1   | 0  | 1   | 0.80 |
| 0  | 0   | 1.00 | 151     | 163 | 5    | 0   | 0  | 0   | 1.00 | 212    | 214 | 5    | 0   | 0  | 0   | 1.00 |
| 0  | 0   | 1.00 | 151     | 153 | 5    | 0   | 0  | 0   | 1.00 | 202    | 206 | 5    | 0   | 0  | 0   | 1.00 |
| 0  | 0   | 1.00 | 143     | 161 | 5    | 0   | 0  | 0   | 1.00 | 202    | 206 | 5    | 0   | 0  | 0   | 1.00 |
| 0  | 0   | 1.00 | 153     | 153 | 5    | 0   | 0  | 0   | 1.00 | 198    | 206 | 5    | 0   | 0  | 0   | 1.00 |
| 0  | 0   | 1.00 | 139     | 139 | 5    | 0   | 0  | 0   | 1.00 | 198    | 212 | 5    | 0   | 0  | 0   | 1.00 |
| 0  | 2   | 0.75 | 143     | 151 | 8    | 0   | 0  | 0   | 1.00 | 214    | 214 | 8    | 0   | 1  | 1   | 0.88 |
| 1  | 1   | 0.80 | 143     | 151 | 5    | 0   | 0  | 0   | 1.00 | 206    | 212 | 5    | 0   | 1  | 1   | 0.80 |
| 0  | 0   | 1.00 | 143     | 143 | 6    | 0   | 1  | 1   | 0.83 | 206    | 206 | 6    | 0   | 0  | 0   | 1.00 |
| 0  | 0   | 1.00 | 151     | 161 | 8    | 2   | 0  | 2   | 0.75 | 206    | 206 | 4    | 0   | 0  | 0   | 1.00 |

|   |   |      |     |     |   |   |   |   |      |     |     |   |   |   |   |      |
|---|---|------|-----|-----|---|---|---|---|------|-----|-----|---|---|---|---|------|
| 1 | 1 | 0.80 | 143 | 161 | 8 | 0 | 0 | 0 | 1.00 | 208 | 210 | 6 | 0 | 0 | 0 | 1.00 |
|---|---|------|-----|-----|---|---|---|---|------|-----|-----|---|---|---|---|------|

| TGLA126 |     |      |     |    |     |      | ETH225 |     |      |     |    |     |      | B   |     |      |
|---------|-----|------|-----|----|-----|------|--------|-----|------|-----|----|-----|------|-----|-----|------|
| A1      | A2  | +PCR | ADO | FA | Err | QI   | A1     | A2  | +PCR | ADO | FA | Err | QI   | A1  | A2  | +PCR |
| 119     | 123 | 5    | 0   | 0  | 0   | 1.00 | 150    | 150 | 5    | 0   | 0  | 0   | 1.00 | 178 | 182 | 5    |
| 115     | 117 | 5    | 0   | 0  | 0   | 1.00 | 148    | 150 | 5    | 0   | 0  | 0   | 1.00 | 180 | 182 | 5    |
| 115     | 117 | 5    | 0   | 0  | 0   | 1.00 | 150    | 150 | 5    | 0   | 0  | 0   | 1.00 | 178 | 182 | 5    |
| 117     | 119 | 5    | 1   | 0  | 1   | 0.80 | 148    | 150 | 5    | 0   | 0  | 0   | 1.00 | 180 | 182 | 5    |
| 119     | 123 | 5    | 0   | 0  | 0   | 1.00 | 148    | 150 | 5    | 0   | 0  | 0   | 1.00 | 180 | 182 | 5    |
| 115     | 117 | 5    | 0   | 0  | 0   | 1.00 | 150    | 150 | 5    | 0   | 0  | 0   | 1.00 | 188 | 188 | 5    |
| 117     | 117 | 5    | 0   | 0  | 0   | 1.00 | 140    | 148 | 5    | 0   | 0  | 0   | 1.00 | 178 | 188 | 5    |
| 115     | 123 | 5    | 0   | 0  | 0   | 1.00 | 150    | 150 | 5    | 0   | 0  | 0   | 1.00 | 180 | 182 | 5    |
| 117     | 123 | 5    | 0   | 0  | 0   | 1.00 | 144    | 148 | 5    | 0   | 0  | 0   | 1.00 | 182 | 182 | 5    |
| 117     | 119 | 5    | 0   | 0  | 0   | 1.00 | 150    | 150 | 5    | 0   | 0  | 0   | 1.00 | 178 | 182 | 5    |
| 117     | 123 | 5    | 0   | 0  | 0   | 1.00 | 144    | 148 | 5    | 0   | 0  | 0   | 1.00 | 178 | 182 | 5    |
| 115     | 123 | 5    | 0   | 0  | 0   | 1.00 | 148    | 150 | 5    | 0   | 0  | 0   | 1.00 | 178 | 182 | 5    |
| 117     | 123 | 5    | 1   | 0  | 1   | 0.80 | 144    | 148 | 5    | 0   | 0  | 0   | 1.00 | 182 | 188 | 5    |
| 115     | 115 | 5    | 0   | 0  | 0   | 1.00 | 144    | 144 | 5    | 0   | 0  | 0   | 1.00 | 180 | 180 | 5    |
| 117     | 117 | 5    | 0   | 0  | 0   | 1.00 | 140    | 152 | 5    | 0   | 0  | 0   | 1.00 | 178 | 182 | 5    |
| 115     | 117 | 5    | 0   | 0  | 0   | 1.00 | 144    | 150 | 5    | 0   | 0  | 0   | 1.00 | 182 | 188 | 5    |
| 115     | 123 | 5    | 1   | 0  | 1   | 0.80 | 144    | 150 | 5    | 0   | 0  | 0   | 1.00 | 178 | 188 | 5    |
| 115     | 123 | 5    | 1   | 0  | 1   | 0.80 | 148    | 148 | 5    | 0   | 0  | 0   | 1.00 | 182 | 182 | 5    |
| 117     | 123 | 5    | 0   | 0  | 0   | 1.00 | 144    | 150 | 5    | 0   | 0  | 0   | 1.00 | 178 | 180 | 5    |
| 115     | 117 | 5    | 0   | 0  | 0   | 1.00 | 144    | 148 | 5    | 0   | 0  | 0   | 1.00 | 178 | 182 | 5    |
| 117     | 123 | 5    | 0   | 0  | 0   | 1.00 | 148    | 150 | 5    | 0   | 0  | 0   | 1.00 | 180 | 188 | 5    |
| 115     | 117 | 5    | 0   | 0  | 0   | 1.00 | 150    | 150 | 5    | 0   | 0  | 0   | 1.00 | 178 | 178 | 5    |
| 117     | 121 | 5    | 0   | 0  | 0   | 1.00 | 146    | 150 | 5    | 0   | 0  | 0   | 1.00 | 188 | 188 | 5    |
| 115     | 117 | 8    | 0   | 0  | 0   | 1.00 | 144    | 150 | 8    | 0   | 0  | 0   | 1.00 | 178 | 180 | 8    |
| 117     | 123 | 8    | 0   | 0  | 0   | 1.00 | 146    | 150 | 8    | 0   | 0  | 0   | 1.00 | 180 | 182 | 8    |
| 115     | 117 | 5    | 0   | 0  | 0   | 1.00 | 150    | 152 | 5    | 0   | 0  | 0   | 1.00 | 178 | 182 | 5    |
| 117     | 125 | 8    | 1   | 0  | 1   | 0.88 | 144    | 150 | 8    | 0   | 0  | 0   | 1.00 | 180 | 188 | 8    |
| 115     | 115 | 8    | 0   | 1  | 1   | 0.88 | 142    | 148 | 8    | 0   | 0  | 0   | 1.00 | 178 | 180 | 8    |
| 115     | 117 | 5    | 0   | 0  | 0   | 1.00 | 144    | 150 | 5    | 0   | 0  | 0   | 1.00 | 178 | 178 | 5    |
| 115     | 117 | 5    | 0   | 0  | 0   | 1.00 | 146    | 150 | 4    | 0   | 0  | 0   | 1.00 | 182 | 182 | 5    |
| 117     | 123 | 5    | 0   | 0  | 0   | 1.00 | 140    | 146 | 5    | 0   | 0  | 0   | 1.00 | 178 | 188 | 5    |
| 115     | 119 | 8    | 1   | 1  | 2   | 0.75 | 148    | 150 | 6    | 0   | 0  | 0   | 1.00 | 182 | 182 | 7    |
| 117     | 121 | 5    | 0   | 0  | 0   | 1.00 | 144    | 148 | 5    | 0   | 0  | 0   | 1.00 | 188 | 188 | 5    |
| 117     | 117 | 5    | 0   | 0  | 0   | 1.00 | 146    | 150 | 5    | 0   | 0  | 0   | 1.00 | 182 | 182 | 5    |
| 117     | 123 | 5    | 0   | 0  | 0   | 1.00 | 140    | 146 | 5    | 0   | 0  | 0   | 1.00 | 180 | 188 | 5    |
| 117     | 117 | 5    | 0   | 0  | 0   | 1.00 | 144    | 146 | 5    | 0   | 0  | 0   | 1.00 | 180 | 180 | 5    |
| 115     | 117 | 5    | 0   | 0  | 0   | 1.00 | 144    | 150 | 5    | 0   | 0  | 0   | 1.00 | 178 | 182 | 5    |
| 117     | 119 | 5    | 0   | 0  | 0   | 1.00 | 146    | 150 | 5    | 0   | 0  | 0   | 1.00 | 178 | 182 | 5    |
| 121     | 123 | 5    | 1   | 0  | 1   | 0.80 | 150    | 150 | 5    | 0   | 0  | 0   | 1.00 | 178 | 180 | 5    |
| 115     | 117 | 5    | 0   | 0  | 0   | 1.00 | 148    | 148 | 5    | 0   | 0  | 0   | 1.00 | 178 | 182 | 5    |
| 115     | 115 | 5    | 0   | 0  | 0   | 1.00 | 144    | 150 | 5    | 0   | 0  | 0   | 1.00 | 178 | 180 | 5    |
| 115     | 121 | 5    | 1   | 0  | 1   | 0.80 | 146    | 150 | 5    | 0   | 0  | 0   | 1.00 | 180 | 180 | 5    |
| 115     | 117 | 5    | 0   | 0  | 0   | 1.00 | 148    | 160 | 5    | 0   | 0  | 0   | 1.00 | 182 | 188 | 5    |
| 121     | 123 | 5    | 0   | 0  | 0   | 1.00 | 140    | 144 | 5    | 0   | 0  | 0   | 1.00 | 180 | 180 | 5    |
| 123     | 123 | 5    | 0   | 0  | 0   | 1.00 | 150    | 150 | 6    | 0   | 1  | 1   | 0.83 | 180 | 180 | 8    |
| 115     | 127 | 5    | 0   | 0  | 0   | 1.00 | 148    | 152 | 5    | 0   | 0  | 0   | 1.00 | 180 | 180 | 5    |
| 121     | 121 | 5    | 0   | 0  | 0   | 1.00 | 148    | 148 | 8    | 0   | 0  | 0   | 1.00 | 182 | 188 | 8    |
| 115     | 117 | 8    | 0   | 0  | 0   | 1.00 | 148    | 150 | 8    | 2   | 0  | 2   | 0.75 | 180 | 182 | 8    |

|     |     |   |   |   |   |      |     |     |   |   |   |   |      |     |     |   |
|-----|-----|---|---|---|---|------|-----|-----|---|---|---|---|------|-----|-----|---|
| 117 | 125 | 7 | 0 | 0 | 0 | 1.00 | 148 | 148 | 8 | 0 | 0 | 0 | 1.00 | 180 | 184 | 7 |
|-----|-----|---|---|---|---|------|-----|-----|---|---|---|---|------|-----|-----|---|



## M1824

[illegible]

|   |   |   |      |
|---|---|---|------|
| 0 | 0 | 0 | 1.00 |
|---|---|---|------|
