# Supplementary material for: Genetic Diversity of Historical and Modern Populations of Russian Cattle Breeds Revealed by Microsatellite Analysis
Source: MDPI journal article supplement (doi:10.3390/genes11080940), 2020-08-14
Supplement: s1 [file s1]

Table S3. Frequency of lost and newly emerged alleles in the studied historical and modern cattle populations\*

| Locus          | Allele     | Historical populations |       |       |       |       | Modern populations |       |
|----------------|------------|------------------------|-------|-------|-------|-------|--------------------|-------|
|                |            | KH_H                   | YR_H  | GR_H  | NV_H  | HL_H  | KH_M               | YR_M  |
| <b>BM2113</b>  | <b>121</b> | -                      | 0,025 | -     | -     | -     | -                  | -     |
|                | <b>129</b> | -                      | -     | 0,250 | 0,250 | -     | -                  | -     |
|                | <b>131</b> | -                      | 0,025 | -     | -     | -     | -                  | -     |
| <b>BM1824</b>  | <b>184</b> | -                      | -     | -     | -     | 0,167 | -                  | -     |
|                | <b>190</b> | -                      | -     | -     | -     | -     | 0,003              | 0,082 |
| <b>ETH10</b>   | <b>211</b> | -                      | -     | -     | 0,250 | -     | -                  | -     |
| <b>ETH225</b>  | <b>158</b> | -                      | -     | -     | -     | -     | -                  | 0,008 |
|                | <b>160</b> | -                      | -     | 0,250 | -     | -     | -                  | -     |
| <b>SPS115</b>  | <b>258</b> | -                      | -     | -     | -     | -     | -                  | 0,016 |
| <b>INRA23</b>  | <b>200</b> | -                      | -     | -     | -     | -     | 0,006              | -     |
|                | <b>204</b> | -                      | 0,050 | -     | -     | -     | -                  | -     |
|                | <b>220</b> | -                      | -     | -     | -     | -     | 0,006              | -     |
| <b>TGLA122</b> | <b>157</b> | -                      | 0,025 | -     | -     | -     | -                  | -     |
|                | <b>167</b> | -                      | 0,025 | -     | -     | -     | -                  | -     |
|                | <b>169</b> | 0,023                  | 0,025 | -     | -     | -     | -                  | -     |
|                | <b>173</b> | -                      | -     | -     | -     | -     | 0,054              | 0,205 |
|                | <b>177</b> | 0,023                  | -     | -     | -     | -     | -                  | -     |
|                | <b>179</b> | 0,023                  | -     | -     | -     | -     | -                  | -     |
|                | <b>181</b> | -                      | 0,025 | -     | -     | -     | -                  | -     |
| <b>TGLA126</b> | <b>183</b> | -                      | -     | -     | -     | -     | -                  | 0,008 |
|                | <b>111</b> | -                      | -     | -     | -     | -     | -                  | 0,016 |
|                | <b>113</b> | -                      | -     | -     | -     | -     | -                  | 0,025 |
|                | <b>125</b> | -                      | 0,025 | -     | -     | 0,167 | -                  | -     |
| <b>TGLA227</b> | <b>127</b> | -                      | -     | -     | 0,250 | -     | -                  | -     |
|                | <b>75</b>  | -                      | -     | -     | -     | -     | 0,006              | 0,057 |
|                | <b>85</b>  | -                      | -     | -     | -     | -     | -                  | 0,008 |
|                | <b>95</b>  | -                      | -     | -     | -     | -     | 0,164              | -     |

\*Modern Holsteins were excluded from the analysis; studied historical populations: KH\_H – Kholmogor breed, YR\_H – Yaroslavl breed, GR\_H – Great Russian cattle, NV\_H – Novgorod cattle, HL\_H – Holland cattle; modern populations: KH\_M – Kholmogor breed, YR\_M – Yaroslavl breed; emerged alleles are presented above the bold line; Lost alleles are presented below the bold line.
