# Supplementary material for: Genetic Diversity of Historical and Modern Populations of Russian Cattle Breeds Revealed by Microsatellite Analysis
Source: MDPI journal article supplement (doi:10.3390/genes11080940), 2020-08-14
Supplement: s1 [file s1]

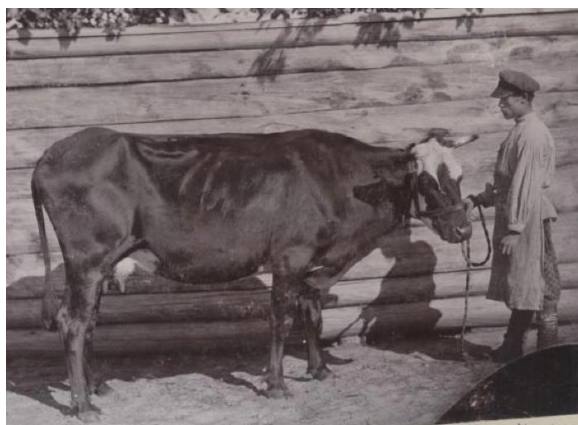

Cow of Kholmogor breed, year 1902<sup>a</sup>

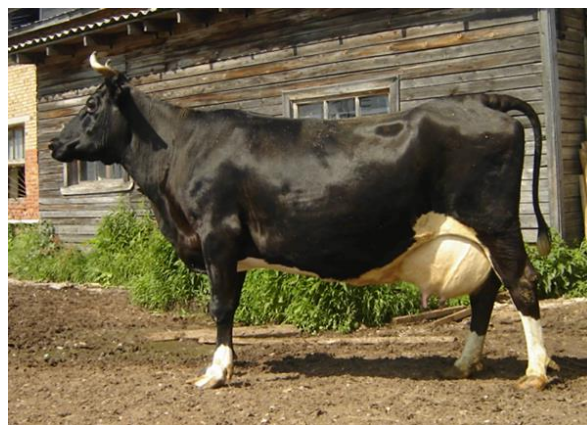

Modern cow of Kholmogor breed<sup>c</sup>

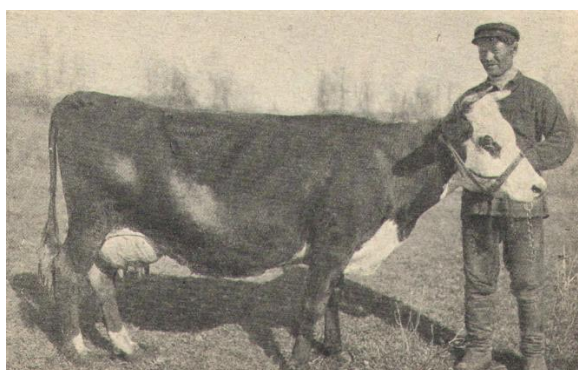

Cow of Yaroslavl breed, year 1925<sup>b</sup>

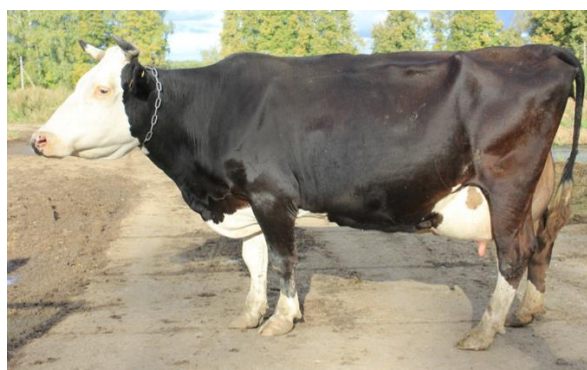

Modern cow of Yaroslavl breed<sup>d</sup>

Figure S1. Historical and modern representatives of Kholmogor and Yaroslavl breeds

Sources:

<sup>a</sup> Photo from the open sources of the "Tobolsk historical and architectural Museum-reserve", available online <http://goskatalog.ru/portal/#/collections?id=3699723> (accessed 05.07.2020).

<sup>b</sup> The state pedigree book of cattle of Yaroslavl breed. People's Commissariat of agriculture of the RSFSR 1929, 3(2), 214 p. (in Russian)

<sup>c</sup> Matyukov V.S., Zharikov Ya.A., Zinovieva N.A. Genetic history and value of the gene pool of the disappearing Kholmogor breed. Dairy and meat cattle breeding, 2018, 2, 2-8 (in Russian)

<sup>d</sup> Catalog of AI bulls. JSC "Yarplem" 2018, 120 p. (in Russian)
