# Supplementary material for: Genetic Diversity of Historical and Modern Populations of Russian Cattle Breeds Revealed by Microsatellite Analysis
Source: MDPI journal article supplement (doi:10.3390/genes11080940), 2020-08-14
Supplement: s1 [file s1]

Table S4. Distribution of allelic drop-outs for the shorter and the longer allele in heterozygous genotypes.

| # | Locus   | Average length, bp | Number of allelic drop-outs |                | X <sup>2</sup> test | P value |
|---|---------|--------------------|-----------------------------|----------------|---------------------|---------|
|   |         |                    | Longer allele               | Shorter allele |                     |         |
| 1 | BM2113  | 133,3              | 2                           | 1              | 0,333               | 0,564   |
| 2 | BM1824  | 181,5              | 3                           | 3              | 0,000               | ns      |
| 3 | ETH10   | 218,5              | 1                           | 5              | 2,667               | 0,103   |
| 4 | ETH225  | 147,7              | 2                           | 0              | 2,000               | 0,157   |
| 5 | INRA023 | 209,2              | 4                           | 1              | 1,800               | 0,180   |
| 6 | SPS115  | 250,6              | 5                           | 2              | 1,286               | 0,257   |
| 7 | TGLA122 | 149,0              | 4                           | 0              | 4,000*              | 0,046   |
| 8 | TGLA126 | 118,2              | 7                           | 1              | 4,500*              | 0,034   |
| 9 | TGLA227 | 87,7               | 2                           | 0              | 2,000               | 0,157   |

\* P < 0.05
