# Supplementary material for: Genetic Diversity of Historical and Modern Populations of Russian Cattle Breeds Revealed by Microsatellite Analysis
Source: Genes (Basel). 2020 Aug 14;11(8):940. doi: 10.3390/genes11080940 (PMC7463645; doi:10.3390/genes11080940)
Supplement: Supplementary file 1 [file genes-11-00940-s001.zip]

Archive with 7 entries (7 files):
- Suppl_Fig_1_foto.pdf
- Suppl_Fig_2_scheme.pdf
- Suppl_Fig_3_K.pdf
- Suppl_Tab_S1.pdf
- Suppl_Tab_S2.pdf
- Suppl_Tab_S3.pdf
- Suppl_Tab_S4.pdf
