# Supplementary figures and images for: Genetic Diversity of Historical and Modern Populations of Russian Cattle Breeds Revealed by Microsatellite Analysis
Source: MDPI journal article supplement (doi:10.3390/genes11080940), 2020-08-14

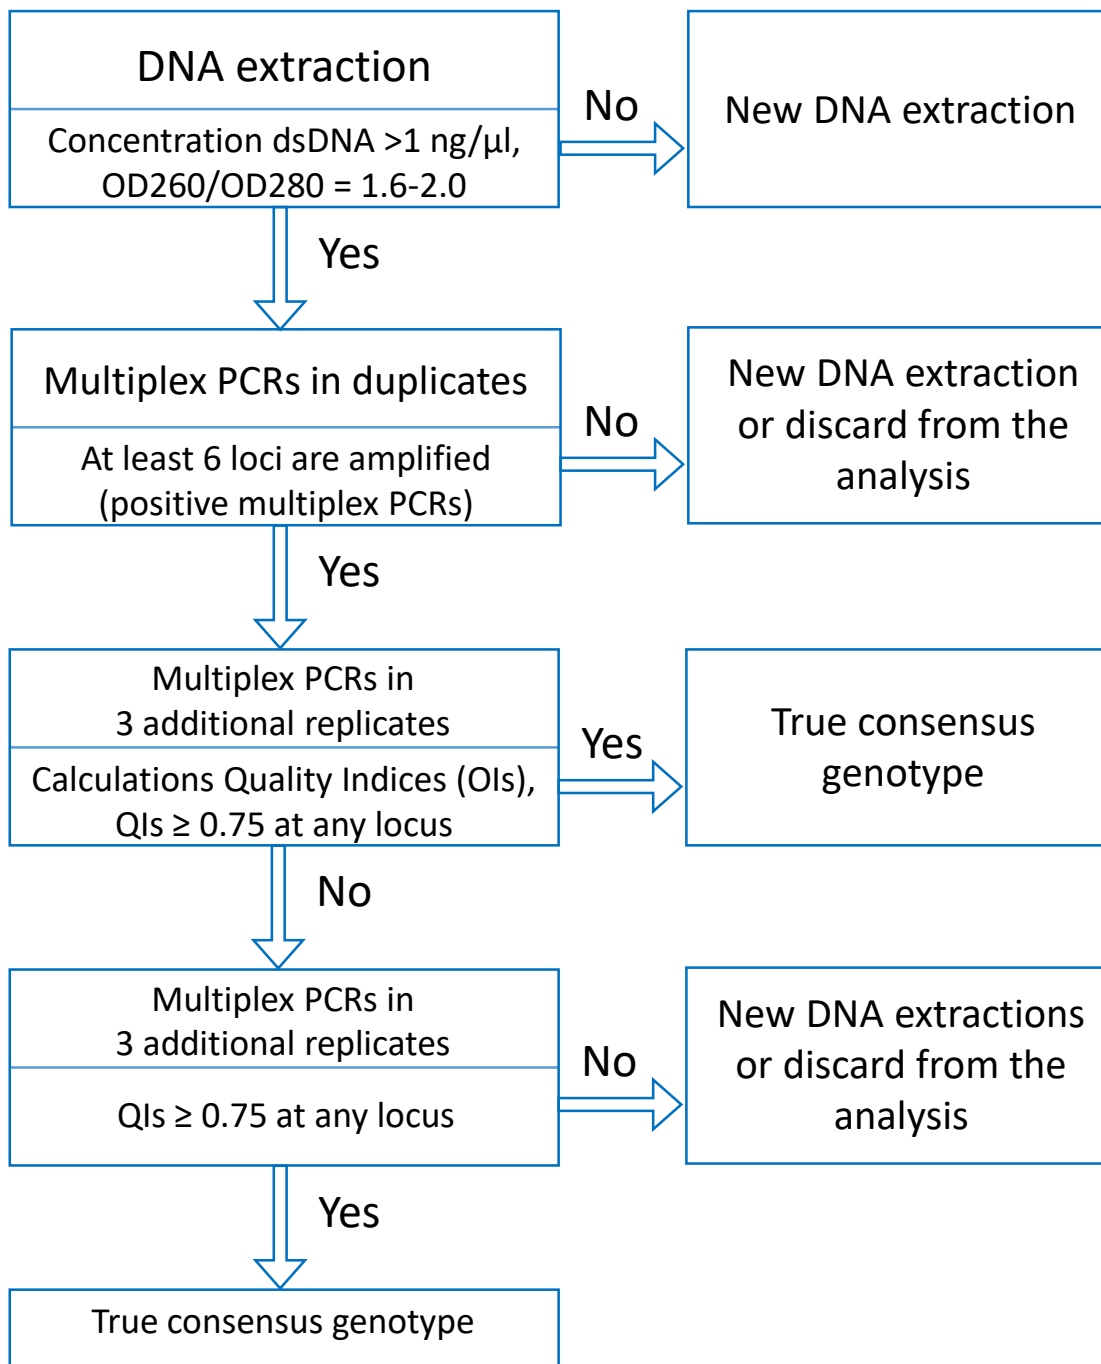

Supplement: s1 [file s1]

$$\Delta K = \text{mean}(|L''(K)|) / \text{stdev}[L(K)]$$

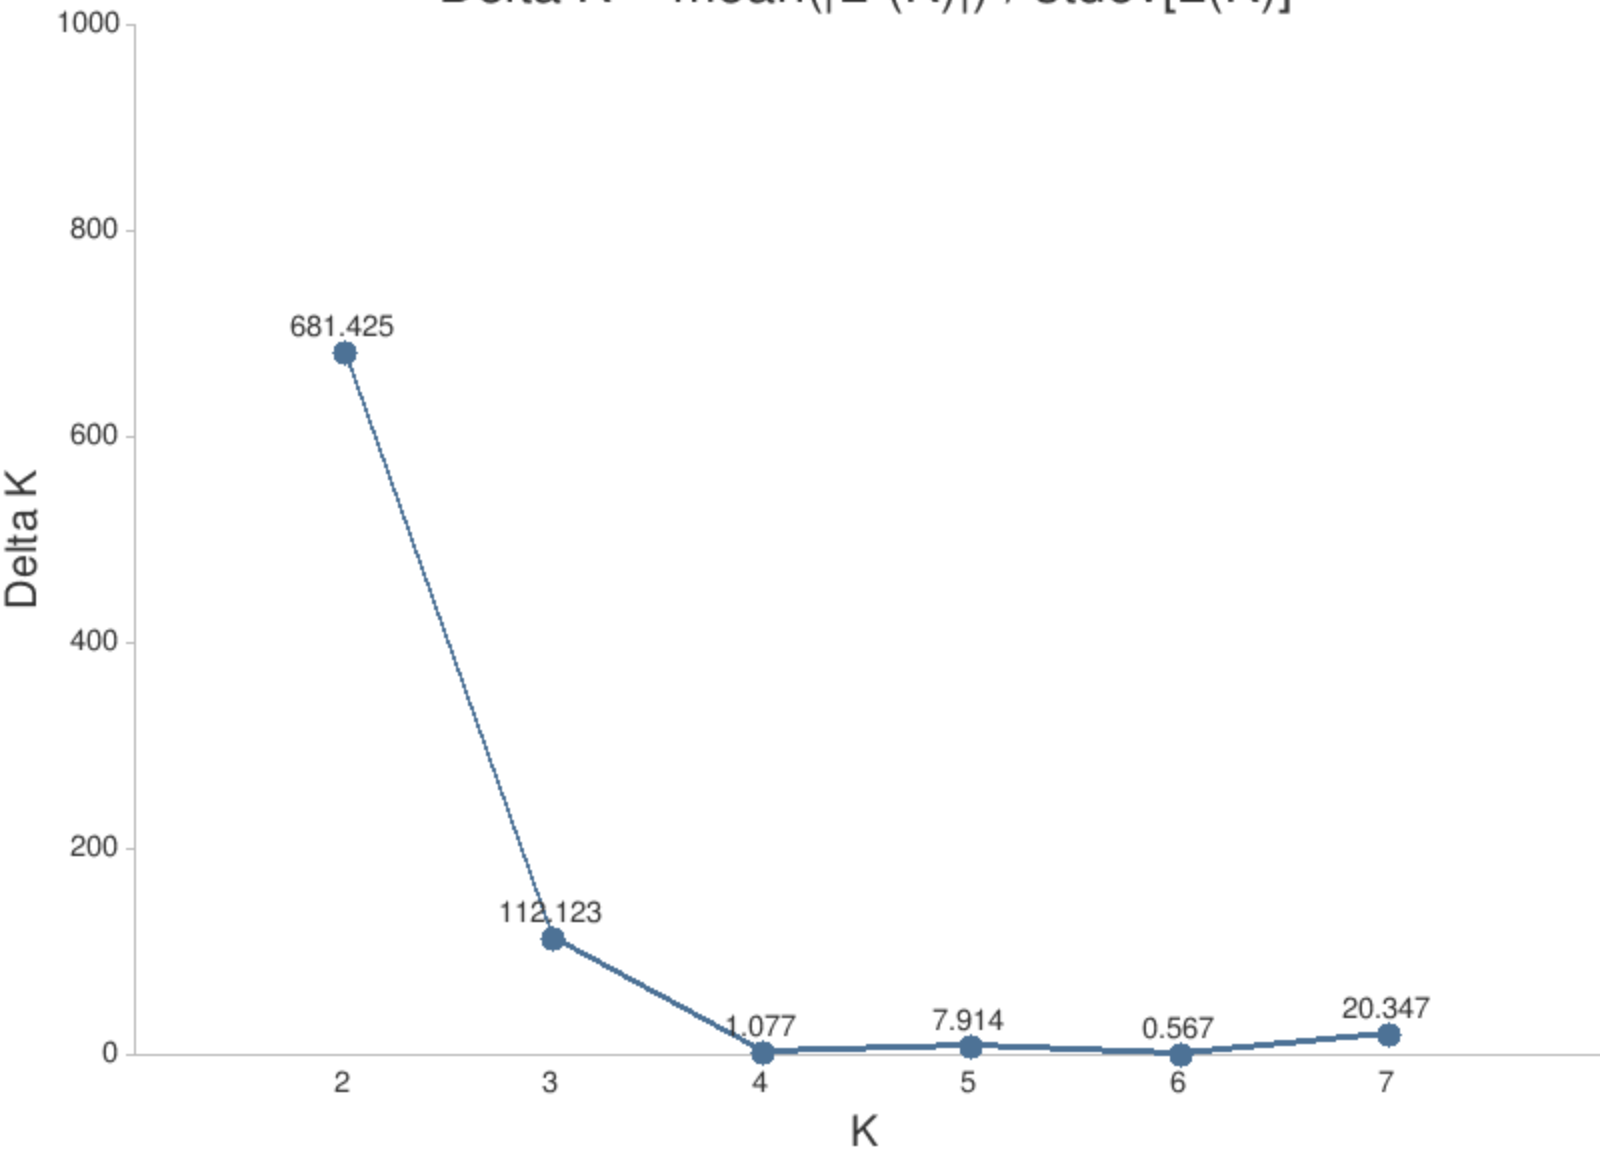

Supplement: s1 [file s1]
